# Supplementary material
Source: Springer Nature journal article supplement (https://www.springermedizin.de/resource/supplementary/12985_2010_843_MOESM12_ESM.pdf/9609312)

# Time Course for Relative Humidity in New Taxis, Tour and Hotel Cars

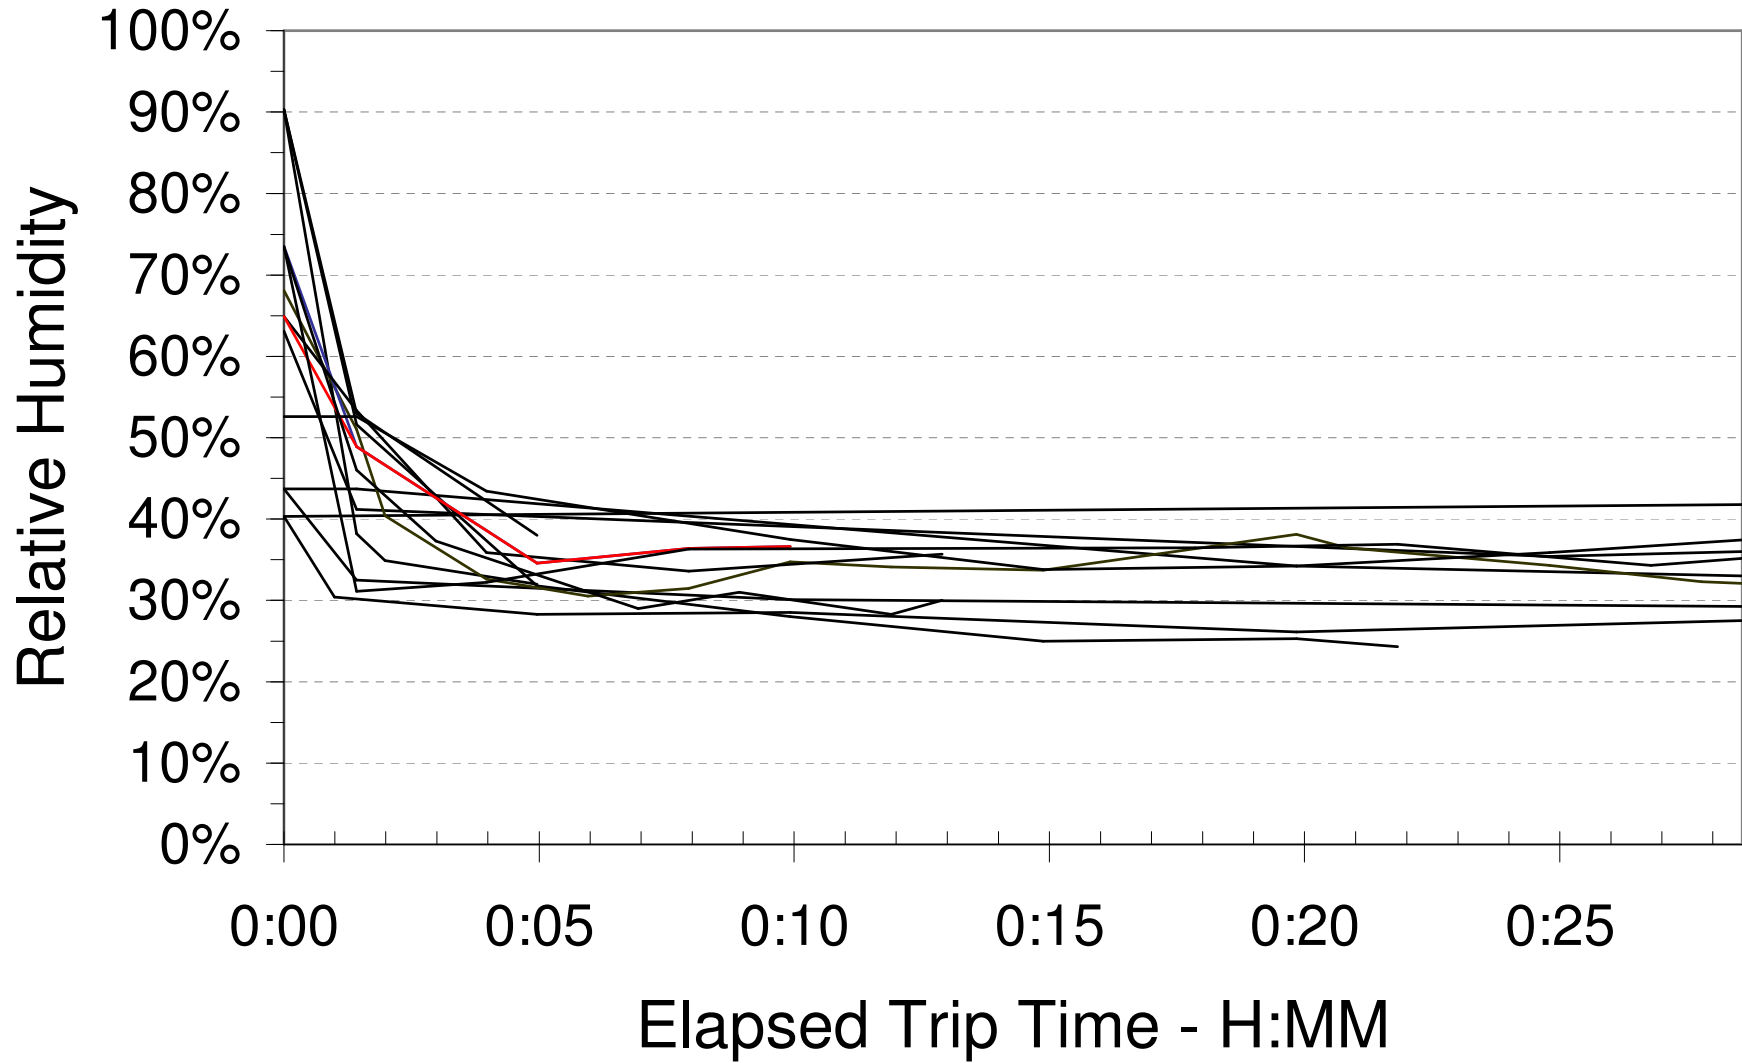

Supplement: MOESM12 [file 9609312]
